# Supplementary material for: TEMPO/TCC as a Chemo Selective Alternative for the Oxidation of Hyaluronic Acid
Source: MDPI journal article supplement (doi:10.3390/molecules26195963), 2021-10-01
Supplement: s1 [file s1]

## Supplementary materials:

### Cell Culture

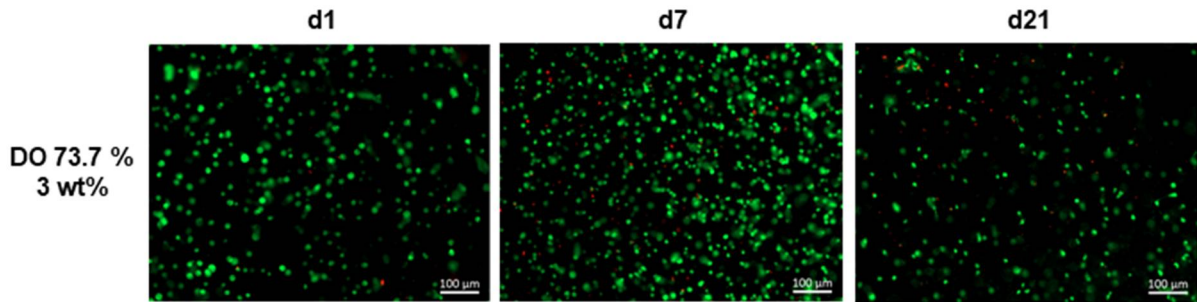

**Figure S1:** Cell viability of in vitro cultured hMSCs in 3 wt% hydrogels (DO 73.7 %) after day 1, 7 and 21, shown by live/dead staining. Viable cells were labeled green with calcein-AM and dead cells with EthD-I.

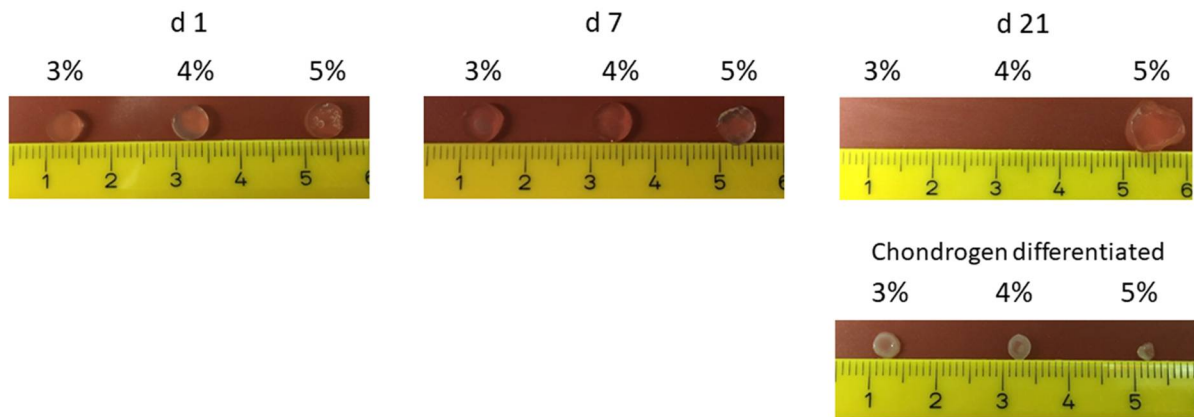

**Figure S2:** Dimensions of the hydrogels (3, 4, and 5 wt%) with proliferated cells over 3 weeks in comparison of hydrogels with chondrogenic differentiated cells (3, 4 and 5 wt%).

### Preparation of Hydrogels

All hydrogels were prepared as described in chapter 2.9 with following voluminal and masses.

**Table S1:** Volumina and masses used for hydrogels for mechanical tests and investigation of degradation/swelling behavior.

| wt% | DO [%]       | m(proxHA) [mg] | V(PBS) | V(ADH 2 wt%) |
|-----|--------------|----------------|--------|--------------|
| 3   | 49.5         | 14.2           | 385.3  | 74.7         |
|     | 55.0         |                | 377.0  | 83.0         |
|     | 57.2         |                | 373.7  | 86.3         |
|     | 73.7         |                | 348.8  | 111.2        |
|     | 53.5 (Blend) |                | 379.6  | 80.4         |
| 2   | 53.5 (Blend) | 9.3            | 353.0  | 107.0        |
| 4   | 53.5 (Blend) | 19.2           | 350.5  | 109.5        |
| 5   | 53.5 (Blend) | 24.2           | 321.4  | 138.6        |

**Table S2:** Volumina and masses used for hydrogels for cell culture experiments.

| wt% | DO [%] | m(proxHA) [mg] | V(PBS) | V(ADH 2 wt%) |
|-----|--------|----------------|--------|--------------|
|-----|--------|----------------|--------|--------------|

|   |              |      |       |       |
|---|--------------|------|-------|-------|
| 3 | 73.7         | 23.2 | 568.7 | 181.3 |
| 3 | 53.5 (Blend) | 23.2 | 617.8 | 132.2 |
| 4 | 53.5 (Blend) | 31.3 | 572.0 | 178.0 |
| 5 | 53.5 (Blend) | 39.5 | 525.1 | 225   |
